# Supplementary material
Source: PubMed Central journal article supplement (PMC2735490)

### **Supplementary Figure 1.**

#### ***Latrunculin B treatment inhibits insulin-induced cell spreading and lamellopodia formation in adipocytes.***

3T3-L1 adipocytes expressing IRAP-pH (green)  $\pm$  1 h pre-treatment with 10  $\mu$ M Latrunculin B were imaged before and after a 30 min insulin stimulation. Representative images (combined phase and TIRFM) of live 3T3-L1 adipocytes expressing IRAP-pH (green)  $\pm$  1 h pre-treatment with 10  $\mu$ M Latrunculin B before and after a 30 min insulin stimulation are shown (A). The white line describes the boundary of the 'cell footprint' prior to insulin stimulation. Scale bars, 10  $\mu$ m. The percentage of cells that show process formation following stimulation with insulin is shown (B). Data is presented as the mean  $\pm$  SEM of 6 independent experiments (10 cells/expt).\*\*\*p<0.001 vs DMSO control insulin, ###p<0.001 vs DMSO control basal.

### **Supplementary Movie 1.**

#### ***Insulin induced actin rearrangement and membrane ruffling in an adipocyte.***

TIRF images acquired at 10 Hz showing the basal membrane of an adipocyte expressing actin-eGFP. Insulin (100 nM) is added at the 1 minute timepoint.

### **Supplementary Movie 2.**

#### ***Insulin stimulates IRAP-pH vesicle fusion and accumulation of fluorescence on the PM.***

TIRFM images acquired at 10 Hz showing the basal membrane of an adipocyte expressing IRAP-pH after treatment with 100 nM insulin.

### **Supplementary Movie 3. *Representative fusion of an IRAPpH containing vesicle with the PM.***

TIRFM images acquired at 10 Hz showing a characteristic fusion of an IRAP-pH containing vesicle with the PM following treatment with 100 nM insulin. Scale bar, 1  $\mu$ m.

# Supplementary Figure 1

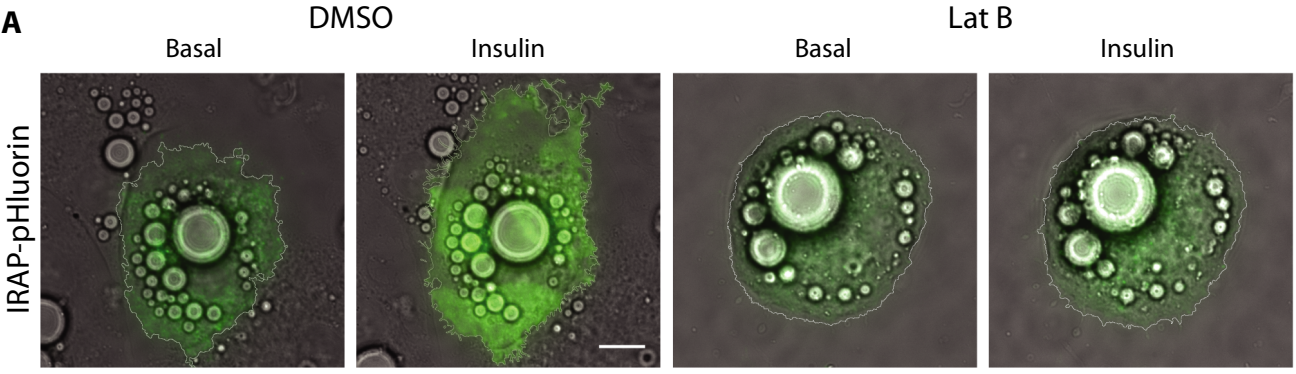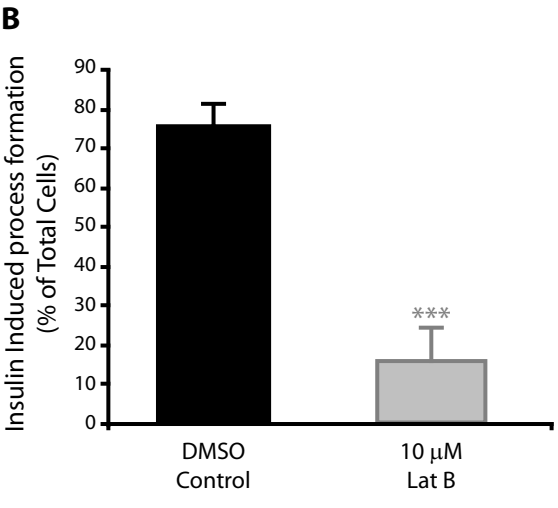

Supplement: E09-03-0187_1.pdf [file E09-03-0187_1.pdf]
